# Supplementary material for: Cohort analysis of outcomes in 69 490 emergency general surgical admissions across an international benchmarking collaborative
Source: PubMed Central journal article supplement — BMJ Open. 2017 Mar 8;7(3):e014484. doi: 10.1136/bmjopen-2016-014484 (PMC5353261; doi:10.1136/bmjopen-2016-014484), 2017-03-08
Supplement: bmjopen-2016-014484supp1.pdf [file bmjopen-2016-014484supp1.pdf]

ICD-10 diagnostic codes for the discharge diagnoses for the cohort of patients included in this study

| <b>ICD-10 code and diagnosis</b>                                                        |
|-----------------------------------------------------------------------------------------|
| <b>Gastrointestinal ulcers</b>                                                          |
| K25.1 Gastric ulcer, acute with perforation                                             |
| K25.2 Gastric ulcer, acute with both haemorrhage and perforation                        |
| K25.5 Gastric ulcer, chronic or unspecified with perforation                            |
| K25.6 Gastric ulcer, chronic or unspecified with both haemorrhage and perforation       |
| K26.1 Duodenal ulcer, acute with perforation                                            |
| K26.2 Duodenal ulcer, acute with both haemorrhage and perforation                       |
| K26.5 Duodenal ulcer, chronic or unspecified with perforation                           |
| K26.6 Duodenal ulcer, chronic or unspecified with both haemorrhage and perforation      |
| K27.1 Peptic ulcer, acute with perforation                                              |
| K27.2 Peptic ulcer, acute with both haemorrhage and perforation                         |
| K27.5 Peptic ulcer, chronic or unspecified with perforation                             |
| K27.6 Peptic ulcer, chronic or unspecified with both haemorrhage and perforation        |
| K28.0 Gastrojejunal ulcer, acute with haemorrhage                                       |
| K28.1 Gastrojejunal ulcer, acute with perforation                                       |
| K28.2 Gastrojejunal ulcer, acute with both haemorrhage and perforation                  |
| K28.3 Gastrojejunal ulcer, acute without haemorrhage or perforation                     |
| K28.5 Gastrojejunal ulcer, chronic or unspecified with perforation                      |
| K28.6 Gastrojejunal ulcer, chronic or unspecified with both haemorrhage and perforation |
| K28.7 Gastrojejunal ulcer, chronic without haemorrhage or perforation                   |
| K28.9 Gastrojejunal ulcer, unspecified without haemorrhage or perforation               |
| <b>Hernias</b>                                                                          |
| K40.0 Bilateral inguinal hernia with obstruction without gangrene                       |
| K40.1 Bilateral inguinal hernia, with gangrene                                          |
| K40.4 Unilateral or unspecified inguinal hernia, with gangrene                          |
| K41.0 Bilateral femoral hernia, with obstruction, without gangrene                      |
| K41.1 Bilateral femoral hernia, with gangrene                                           |
| K41.3 Unilateral or unspecified femoral hernia with obstruction without gangrene        |
| K41.4 Unilateral or unspecified femoral hernia, with gangrene                           |
| K42.1 Umbilical hernia with gangrene                                                    |
| K43.0 Ventral hernia with obstruction, without gangrene                                 |
| K43.1 Ventral hernia with gangrene                                                      |
| K44.0 Diaphragmatic hernia with obstruction, without gangrene                           |
| K44.1 Diaphragmatic hernia with gangrene                                                |

|                                                                                         |
|-----------------------------------------------------------------------------------------|
| K45.0 Other specified abdominal hernia with obstruction without gangrene                |
| K45.1 Other specified abdominal hernia with gangrene                                    |
| K46.0 Unspecified abdominal hernia with obstruction without gangrene                    |
| K46.1 Unspecified abdominal hernia with gangrene                                        |
| <b>Bowel ischaemia</b>                                                                  |
| K55.0 Acute vascular disorders of intestine                                             |
| K55.1 Chronic vascular disorders of intestine                                           |
| K55.8 Other vascular disorders of intestine                                             |
| K55.9 Vascular disorder of intestine, unspecified                                       |
| <b>Bowel obstruction</b>                                                                |
| K56.0 Paralytic ileus                                                                   |
| K56.1 Intussusception                                                                   |
| K56.2 Volvulus                                                                          |
| K56.3 Gallstone ileus                                                                   |
| K56.4 Other impaction of intestine                                                      |
| K56.5 Intestinal adhesions [bands] with obstruction                                     |
| K56.6 Other and unspecified intestinal obstruction                                      |
| K56.7 Ileus, unspecified                                                                |
| <b>Diverticulitis</b>                                                                   |
| K57.0 Diverticular disease of small intestine with perforation and abscess              |
| K57.2 Diverticular disease of large intestine with perforation and abscess              |
| K57.4 Diverticular disease of both small and large intestine with perforation + abscess |
| K57.8 Diverticular disease of intestine, part unspecified, with perforation and abscess |
| <b>Disorders of peritoneum</b>                                                          |
| K65.0 Acute peritonitis                                                                 |
| K65.8 Other peritonitis                                                                 |
| K65.9 Peritonitis, unspecified                                                          |
| K66.1 Haemoperitoneum                                                                   |
| K66.8 Other specified disorders of peritoneum                                           |
| K66.9 Disorder of peritoneum, unspecified                                               |
| <b>Liver and biliary conditions</b>                                                     |
| K76.2 Central haemorrhagic necrosis of liver                                            |
| K76.3 Infarction of liver                                                               |
| K76.8 Other specified diseases of liver                                                 |
| K80.3 Calculus of bile duct with cholangitis                                            |
| K82.0 Obstruction of gallbladder                                                        |
| K82.2 Perforation of gallbladder                                                        |
| K82.3 Fistula of gallbladder                                                            |
| K83.0 Cholangitis                                                                       |
| K83.1 Obstruction of bile duct                                                          |
| K83.2 Perforation of bile duct                                                          |
| <b>Miscellaneous diagnoses</b>                                                          |
| K22.3 Perforation of oesophagus                                                         |
| K31.0 Acute dilatation of stomach                                                       |
| K31.1 Adult hypertrophic pyloric stenosis                                               |
| K31.5 Obstruction of duodenum                                                           |
| K31.6 Fistula of stomach and duodenum                                                   |
| K59.3 Megacolon, not elsewhere classified                                               |
| K59.8 Other specified functional intestinal disorders                                   |
| K63.0 Abscess of intestine                                                              |
| K63.1 Perforation of intestine (non-traumatic)                                          |

|                    |
|--------------------|
| K63.4 Enteroptosis |
|--------------------|

|                                             |
|---------------------------------------------|
| K63.8 Other specified diseases of intestine |
|---------------------------------------------|
